# Supplementary material for: Clonal and atypical Toxoplasma strain differences in virulence vary with mouse sub-species
Source: PubMed Central journal article supplement (PMC6344230; doi:10.1016/j.ijpara.2018.08.007), 2019-01

A

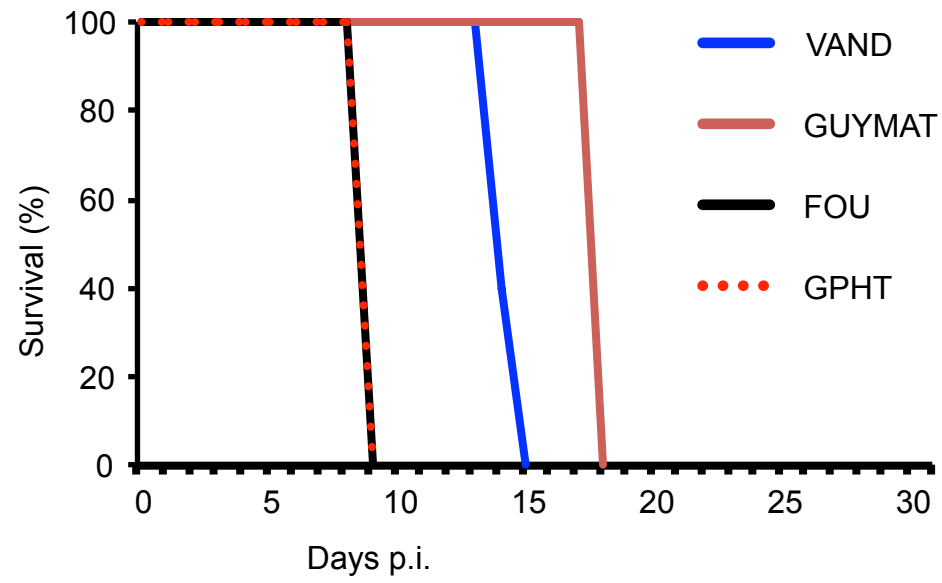

B

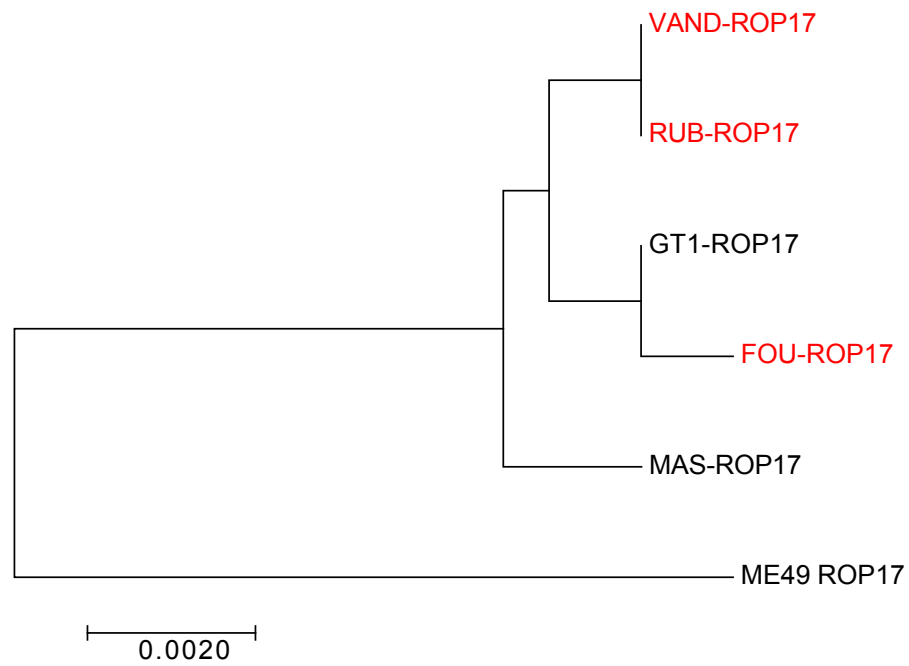

Supplement: mmc2.pdf [file mmc2.pdf]
